# Supplementary material for: Changes in Short-Term and Ultra-Short Term Heart Rate, Respiratory Rate, and Time-Domain Heart Rate Variability Parameters during Sympathetic Nervous System Activity Stimulation in Elite Modern Pentathlonists—A Pilot Study
Source: MDPI journal article supplement (doi:10.3390/diagnostics10121104), 2020-12-17
Supplement: s1 [file s1]

**Table S1.** Individual athletes' responses in heart rate (HR) and respiratory rate (RespRate) during sympathetic nervous system activity (SNSa) stimulation.

|                                   | SWC | # | Baseline           |          |          |          |          | SNSa stimulation |          |          |          |          |
|-----------------------------------|-----|---|--------------------|----------|----------|----------|----------|------------------|----------|----------|----------|----------|
|                                   |     |   | 1 min<br>Criterion | 2<br>min | 3<br>min | 4<br>min | 5<br>min | 1<br>min         | 2<br>min | 3<br>min | 4<br>min | 5<br>min |
| <b>HR [bpm]</b>                   | 2.4 | 1 | 71                 | -        | ↓        | -        | -        | ↓                | -        | ↑        | -        | -        |
|                                   |     | 2 | 56                 | -        | -        | -        | ↓        | ↑                | -        | ↑        | ↑        | ↑        |
|                                   |     | 3 | 67                 | ↓        | ↓        | -        | -        | ↑                | ↑        | -        | ↓        | ↑        |
|                                   |     | 4 | 47                 | -        | -        | -        | -        | ↑                | ↑        | ↑        | ↑        | ↑        |
|                                   |     | 5 | 63                 | -        | -        | -        | -        | -                | -        | -        | -        | ↑        |
|                                   |     | 6 | 87                 | ↓        | ↓        | ↓        | ↓        | ↓                | ↑        | ↑        | ↑        | -        |
|                                   |     | 7 | 56                 | -        | -        | ↑        | ↑        | ↑                | ↑        | ↑        | ↑        | ↑        |
|                                   |     | 8 | 65                 | -        | -        | -        | -        | ↑                | -        | ↑        | ↑        | -        |
| <b>RespRate<br/>[breaths/min]</b> | 1   | 1 | 16                 | -        | -        | -        | -        | -                | ↓        | -        | -        | -        |
|                                   |     | 2 | 10                 | -        | -        | -        | -        | ↑                | -        | -        | -        | -        |
|                                   |     | 3 | 14                 | -        | ↓        | -        | ↓        | -                | ↓        | ↓        | -        | -        |
|                                   |     | 4 | 16                 | -        | -        | -        | -        | -                | -        | -        | -        | ↓        |
|                                   |     | 5 | 13                 | -        | -        | -        | -        | ↑                | ↑        | -        | ↓        | -        |
|                                   |     | 6 | 17                 | -        | -        | -        | -        | -                | ↓        | -        | -        | -        |
|                                   |     | 7 | 13                 | -        | -        | -        | -        | -                | -        | -        | -        | ↓        |
|                                   |     | 8 | 19                 | -        | -        | -        | -        | -                | -        | ↓        | ↓        | -        |

↑ – increased / ↓ – decreased more than smallest worthwhile change (SWC) or not (-); Baseline: in comparison to 1 min Criterion; sympathetic nervous system activity (SNSa) stimulation: 1st min: ↑ – increased / ↓ – decreased more than SWC or not (-) in comparison to 1 min Criterion from Baseline; next minutes (2nd, 3rd, 4th, 5th) of SNSa stimulation: comparison to previous min of SNSa stimulation

**Table S2.** Individual athletes' responses in standard deviation of normal-to-normal RR intervals (SDNN) and root mean square of successive differences (RMSSD) parameters during sympathetic nervous system activity SNSa stimulation.

|             | SWC  | # | Baseline |       |       |       |       | SNSa stimulation |       |       |       |       |
|-------------|------|---|----------|-------|-------|-------|-------|------------------|-------|-------|-------|-------|
|             |      |   | 1 min    | 2 min | 3 min | 4 min | 5 min | 1 min            | 2 min | 3 min | 4 min | 5 min |
| SDNN [ms]   | 4.2  | 1 | 56.0     | ↓     | ↓     | ↓     | ↓     | ↓                | ↑     | ↓     | ↑     | -     |
|             |      | 2 | 94.6     | ↓     | ↓     | ↓     | ↓     | ↓                | ↑     | ↓     | ↓     | ↓     |
|             |      | 3 | 27.3     | -     | ↑     | -     | -     | ↓                | ↑     | -     | -     | ↓     |
|             |      | 4 | 44.1     | -     | -     | -     | -     | ↑                | ↑     | ↓     | ↓     | ↓     |
|             |      | 5 | 30.7     | ↑     | ↑     | -     | ↑     | -                | ↑     | -     | ↓     | -     |
|             |      | 6 | 42.4     | ↓     | ↓     | -     | -     | ↓                | ↑     | ↓     | -     | -     |
|             |      | 7 | 50.0     | ↑     | ↑     | ↑     | ↓     | ↓                | ↑     | -     | ↓     | ↓     |
|             |      | 8 | 53.8     | ↓     | ↓     | ↓     | ↓     | ↓                | -     | ↓     | -     | -     |
| RMSSD [ms]  | 3.3  | 1 | 46.0     | ↑     | ↑     | -     | -     | ↓                | ↑     | ↓     | ↑     | ↓     |
|             |      | 2 | 81.2     | ↓     | -     | ↓     | ↓     | ↓                | ↑     | -     | ↓     | ↓     |
|             |      | 3 | 28.8     | -     | -     | ↑     | -     | ↓                | -     | ↓     | ↑     | ↓     |
|             |      | 4 | 66.6     | ↑     | -     | ↑     | ↓     | ↑                | ↓     | ↓     | ↓     | ↓     |
|             |      | 5 | 35.8     | ↑     | -     | ↓     | ↑     | ↑                | -     | -     | ↓     | ↓     |
|             |      | 6 | 51.7     | -     | -     | -     | -     | ↓                | ↑     | ↓     | ↓     | -     |
|             |      | 7 | 56.6     | ↑     | ↑     | ↓     | ↓     | ↓                | ↓     | ↑     | ↓     | ↓     |
|             |      | 8 | 49.4     | -     | ↓     | -     | ↓     | ↓                | ↓     | ↓     | -     | ↓     |
| lnRMSSD     | 0.07 | 1 | 3.83     | ↑     | ↑     | -     | -     | ↓                | ↑     | ↓     | ↑     | ↓     |
|             |      | 2 | 4.40     | ↓     | -     | ↓     | ↓     | ↓                | ↑     | ↓     | ↓     | ↓     |
|             |      | 3 | 3.36     | ↑     | ↑     | ↑     | -     | ↓                | -     | ↓     | ↑     | ↓     |
|             |      | 4 | 4.20     | ↑     | -     | ↑     | -     | ↑                | -     | ↓     | ↓     | ↓     |
|             |      | 5 | 3.58     | ↑     | -     | ↓     | ↑     | ↑                | -     | -     | ↓     | ↓     |
|             |      | 6 | 3.95     | -     | -     | -     | -     | ↓                | ↑     | ↓     | ↓     | ↑     |
|             |      | 7 | 4.04     | ↑     | ↑     | ↓     | ↓     | ↓                | ↓     | ↑     | ↓     | ↓     |
|             |      | 8 | 3.90     | -     | ↓     | -     | ↓     | ↓                | ↓     | ↓     | ↓     | ↓     |
| lnRMSSD/mRR | 0.06 | 1 | -2.91    | ↓     | -     | -     | -     | ↑                | ↓     | ↑     | ↓     | ↑     |
|             |      | 2 | -2.58    | ↑     | -     | ↑     | ↑     | ↑                | ↓     | -     | -     | ↑     |
|             |      | 3 | -3.44    | -     | -     | ↓     | -     | ↑                | ↓     | ↑     | ↓     | ↑     |
|             |      | 4 | -2.95    | ↓     | -     | ↓     | -     | ↓                | ↓     | ↑     | ↑     | ↑     |
|             |      | 5 | -3.28    | ↓     | ↓     | ↑     | ↑     | ↓                | -     | -     | ↑     | ↑     |
|             |      | 6 | -2.59    | ↑     | -     | ↑     | -     | ↑                | ↓     | ↑     | ↑     | ↓     |
|             |      | 7 | -2.94    | ↓     | ↓     | -     | ↑     | ↑                | ↑     | ↓     | ↑     | ↑     |
|             |      | 8 | -2.93    | -     | ↑     | -     | ↑     | ↑                | ↑     | ↑     | ↑     | ↑     |

↑ – increased / ↓ – decreased more that smallest worthwhile change (SWC) or not (-); Baseline: in comparison to 1 min Criterion; sympathetic nervous system activity (SNSa) stimulation: 1st min: ↑ – increased / ↓ – decreased more that SWC or not (-) in comparison to 1 min Criterion from Baseline; next minutes (2nd, 3rd, 4th, 5th) of SNSa stimulation: comparison to previous min of SNSa stimulation

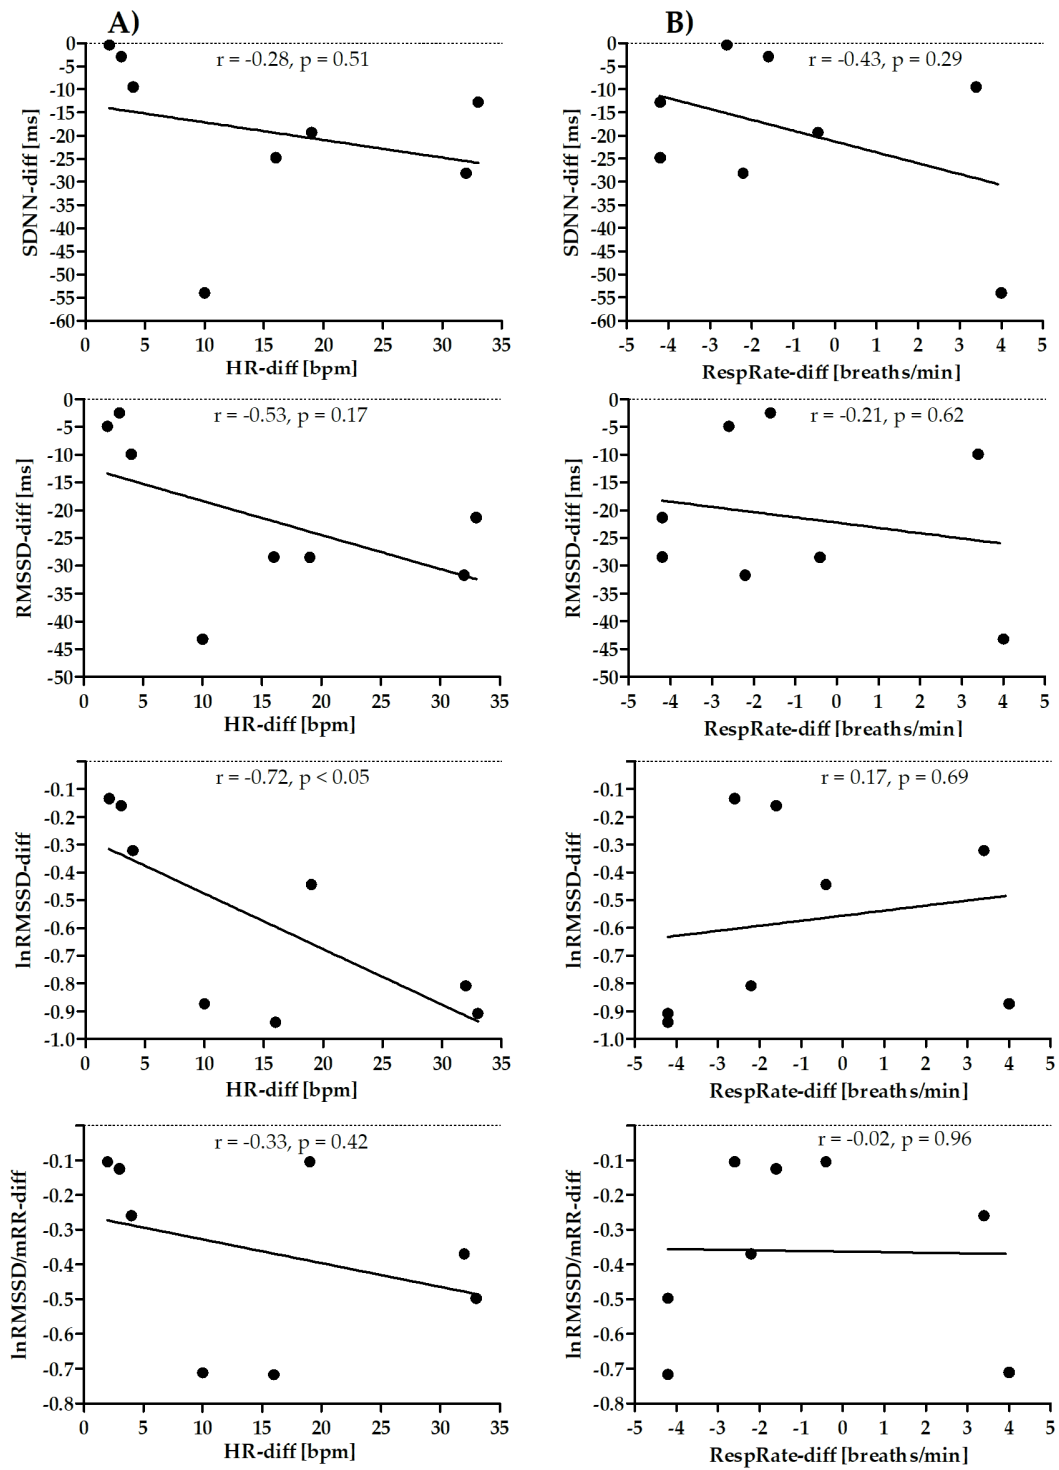

**Figure S1.** Relationship among differences between sympathetic nervous system activity (SNSa) stimulation and Baseline in heart rate variability (HRV) parameters (Parameter-diff) and heart rate (HR) (HR-diff) (A) and respiratory rate (RespRate) (RespRate-diff) (B).
